# Supplementary material for: Overweight and Obesity Among School-aged Children and Maternal Preventive Practices against Childhood Obesity in Select Local Government Areas of Lagos, Southwest, Nigeria
Source: PubMed Central journal article supplement — Int J MCH AIDS. 2019;8(1):70–83. doi: 10.21106/ijma.273 (PMC6630490; doi:10.21106/ijma.273), 2019
Supplement: IJMA-8-70_appendix.pdf [file IJMA-8-70_appendix.pdf]

# APPENDIX I

## QUESTIONNAIRE

S/NO

### SECTION A: SOCIO-DEMOGRAPHIC CHARACTERISTICS

#### CHILD INFORMATION

1. Age of child (last birthday): [ ]
2. Sex of child: (a) Male [ ] (b) Female [ ]
3. Number of siblings of child: [ ]
4. The child was exclusively breastfed: (a) Yes [ ] (b) No [ ]
5. How old was the child when the mother stopped breastfeeding?  
(a) 3-6 months [ ] (b) 6-9 months [ ] (c) 9-12 months [ ] (d) 12-24 months [ ]  
(e) More than 24 months
6. Type of food for complementary feeds:  
(a) Locally available foods [ ] (b) Processed Foods [ ] (c) Both [ ]

#### MOTHER'S INFORMATION

1. Age (last birthday): [ ]
2. Marital Status: (a) Single [ ] (b) Married [ ] (c) Divorced [ ]  
(d) Widowed [ ] (e) Separated [ ]
3. Religion: (a) Christian [ ] (b) Islam [ ] (c) Traditional [ ] (d) Others \_\_\_\_\_
4. Ethnic group: (a) Yoruba [ ] (b) Igbo [ ] (c) Hausa [ ] (d) Others \_\_\_\_\_
5. Highest level of education: (a) Primary [ ] (b) Secondary [ ] (c) Tertiary [ ]  
(d) Vocational [ ] (e) Quranic [ ] (f) None [ ]
6. Occupation:
7. What is the net average monthly income of your family (in Naira)?  
(a) <20,000 [ ] (b) 20,001–80,000 [ ] (c) 80,001–200,000 [ ] (d) >200,000 [ ]
8. Weight (kg): [ ]
9. Height (m): [ ]
10. BMI (kg/m<sup>2</sup>): [ ]

### SECTION B: FOOD CONSUMPTION PATTERN

1. How much is spent on food per week for the family?  
(a) <2,000 [ ] (b) 2,001–10,000 [ ] (c) 10,001–100,000 [ ] (d) >100,000 [ ]

2. What factors affect food selection in the family? (Select all that applies)
- (a) Availability of food [ ] (b) Taste of food [ ] (c) Price of food [ ] (d) Family menu [ ]  
 (e) Ease of preparation [ ] (f) Parents favorite [ ] (g) Community choice [ ]  
 (h) Others \_\_\_\_\_
3. How often are the following foods eaten by the child?

|                                                                                                                                                                  | Daily | Once<br>in a<br>week | Two<br>times in<br>a week | More than<br>twice in a<br>week | Once<br>a<br>month | Never |
|------------------------------------------------------------------------------------------------------------------------------------------------------------------|-------|----------------------|---------------------------|---------------------------------|--------------------|-------|
| <b>Cereal</b><br>Rice, wheat, corn, custard, pap, oat                                                                                                            |       |                      |                           |                                 |                    |       |
| <b>Processed cereal</b><br>Noodles, spaghetti, cornflakes, golden morn                                                                                           |       |                      |                           |                                 |                    |       |
| <b>Roots and Tubers</b><br>Yam, Cassava (Garri, Fufu, Lafu),Potatoes, Cocoyam, Plantain                                                                          |       |                      |                           |                                 |                    |       |
| <b>Fruits</b><br>Pineapple, pawpaw, orange, watermelon, banana, etc                                                                                              |       |                      |                           |                                 |                    |       |
| <b>Leafy vegetables</b><br>Bitter leaf, spinach, water leaf                                                                                                      |       |                      |                           |                                 |                    |       |
| <b>Non-leafy vegetables</b><br>Okro, tomato, cucumber, carrot, cabbage                                                                                           |       |                      |                           |                                 |                    |       |
| <b>Dairy products</b><br>Milk, cheese, yoghurt, ice-cream, skimmed milk/ 0-2% fat milk                                                                           |       |                      |                           |                                 |                    |       |
| <b>Meat &amp; Products</b><br>Red meat (Beef, goat/bush meat, pork), Poultry and products<br>(Chicken, turkey, egg), Fish and products (Fish, crayfish, shrimps) |       |                      |                           |                                 |                    |       |
| <b>Bakery Products</b><br>Bread, Biscuit, cake, meat-pie, doughnuts and other salty snacks                                                                       |       |                      |                           |                                 |                    |       |
| <b>Fats and Oil</b><br>Red palm oil, Vegetable/Groundnut oil, Margarine, butter                                                                                  |       |                      |                           |                                 |                    |       |
| <b>Confectionaries</b><br>Sweets, chocolates                                                                                                                     |       |                      |                           |                                 |                    |       |
| <b>Beverages</b><br>Cocoa, milo, bournvita                                                                                                                       |       |                      |                           |                                 |                    |       |
| <b>Carbonated soft drinks</b><br>Coke, malt, fanta, pepsi, teem, la casera, etc                                                                                  |       |                      |                           |                                 |                    |       |
| <b>Caffeine (Coffee, tea)</b>                                                                                                                                    |       |                      |                           |                                 |                    |       |

4. How many meals does your child eat daily?  
 (a) Less than 3 times [ ] (b) 3 times [ ] (c) More than 3 times [ ]
5. How often does your child eat breakfast (in the morning) in a week?  
 (a) Never [ ] (b) 1-2 days [ ] (c) 3-4 days [ ] (d) 5-6 days [ ] (e) Everyday [ ]
6. How often does your child eat in a buka/ fast food restaurant?  
 (a) Never [ ] (b) 1-2 days [ ] (c) 3-4 days [ ] (d) 5-6 days [ ] (e) Everyday [ ]
7. Select the most appropriate option: (a) My child buys lunch in school [ ]  
 (b) My child takes food from home to school [ ] (c) Both [ ] (d) Neither [ ]
8. How can you describe your child's eating habit?  
 (a) Eats a lot [ ] (b) Does not eat well [ ] (c) Eats normal [ ]

## SECTION C: PHYSICAL ACTIVITY OF CHILD

- How does your child go to school? (a) Walk to school [ ] (b) Driven in a car to school [ ]  
(c) Ride bicycle to school (d) Joins school bus/ public transport
- What kind of activities does your child engage in often? (Select all that applies):  
(a) Playing football [ ] (b) Swimming [ ] (c) Skipping [ ] (d) Jogging/Walking [ ]  
(e) Dancing [ ] (f) Playing games which involves physical activity [ ]  
(g) Chores which involves physical activity [ ]
- How long does your child spend on these choice of activities above daily?  
(a) < 1 hour [ ] (b) 1-3 hours [ ] (c) 3-6 hours [ ] (d) > 6 hours [ ]
- Which of the following does your child engage in often? (Select all that applies):  
(a) Watching TV [ ] (b) Playing video games [ ] (c) Spending time on computer/tablet/phone [ ]  
(d) Staying indoors Idle [ ] (e) Playing card/ludo games [ ]
- How long does your child spend on these choice of activities above daily?  
(a) < 1 hour [ ] (b) 1-3 hours [ ] (c) 3-6 hours [ ] (d) > 6 hours [ ]

## SECTION D: MOTHERS PREVENTIVE PRACTICES

Please tick where appropriate:

### CHILD FEEDING QUESTIONNAIRE

Never Rarely Some Often Always  
Times

#### Restriction

- I have to be sure my child does not eat too many sweets
- I have to be sure my child does not eat too many high fat foods
- I have to be sure my child does not eat too much of her favorite food
- I intentionally keep some foods out of my child's reach
- I offer sweets (candy, ice cream, cake, pastries) to my child as a reward for good behavior
- I offer my child her favorite foods in exchange for good behavior
- If I did not guide or regulate my child's eating, she would eat too many junk foods
- If I did not guide or regulate my child's eating, she would eat too much of her favorite foods

#### Pressure to Eat

- My child should always eat all of the food on her plate
- I have to be especially careful to make sure my child eats enough
- If my child says "I'm not hungry", I try to get her to eat anyway
- If I did not guide or regulate my child's eating, she would eat much less than she should

#### Concern About Child Weight

- Are you concerned about your child eating too much when you are not around him/her?
- Are you concerned about your child having to diet to maintain a desirable weight
- Are you concerned about your child becoming overweight

## SECTION E: ANTHROPOMETRIC MEASUREMENT

| Measurement/ Index       | 1 <sup>st</sup> measurement | 2 <sup>nd</sup> measurement | Average |
|--------------------------|-----------------------------|-----------------------------|---------|
| Weight (kg)              |                             |                             |         |
| Height (m)               |                             |                             |         |
| BMI (kg/m <sup>2</sup> ) |                             |                             |         |
